# Supplementary material for: Calcarides A–E, Antibacterial Macrocyclic and Linear Polyesters from a Calcarisporium Strain
Source: MDPI journal article supplement (doi:10.3390/md11093309), 2013-08-29
Supplement: s1 [file s1]

## Supplementary Information

**Figure S1.**  $^1\text{H}$  NMR (500 MHz, acetone- $d_6$ ) spectrum of calcaride A (**6**).

**Figure S2.**  $^{13}\text{C}$  NMR (500 MHz, acetone- $d_6$ ) spectrum of calcaride A (**6**).

**Figure S3.** COSY (500 MHz, acetone- $d_6$ ) spectrum of calcaride A (**6**).

**Figure S4.** HSQC (500 MHz, acetone- $d_6$ ) spectrum of calcaride A (**6**).

**Figure S5.** HMBC (500 MHz, acetone- $d_6$ ) spectrum of calcaride A (**6**).

**Figure S6.**  $^1\text{H}$  NMR (500 MHz, methanol- $d_4$ ) spectrum of calcaride B (**7**).

**Figure S7.**  $^1\text{H}$  NMR (500 MHz, methanol- $d_4$ ) spectrum of calcaride C (**8**).

**Figure S8.**  $^1\text{H}$  NMR (500 MHz, methanol- $d_4$ ) spectrum of calcaride D (**9**).

**Figure S9.**  $^1\text{H}$  NMR (600 MHz, methanol- $d_4$ ) spectrum of calcaride E (**10**).

**Table S1.** NMR spectroscopic data (500 MHz, methanol- $d_4$ ) of calcaride B (**7**).

**Table S2.** NMR spectroscopic data (500 MHz, methanol- $d_4$ ) of calcaride C (**8**).

**Table S3.** NMR spectroscopic data (500 MHz, methanol- $d_4$ ) of calcaride D (**9**).

**Table S4.** NMR spectroscopic data (600 MHz, methanol- $d_4$ ) of calcaride E (**10**).

**Figure S1.**  $^1\text{H}$  NMR (500 MHz, acetone- $d_6$ ) spectrum of calcaride A (**6**).

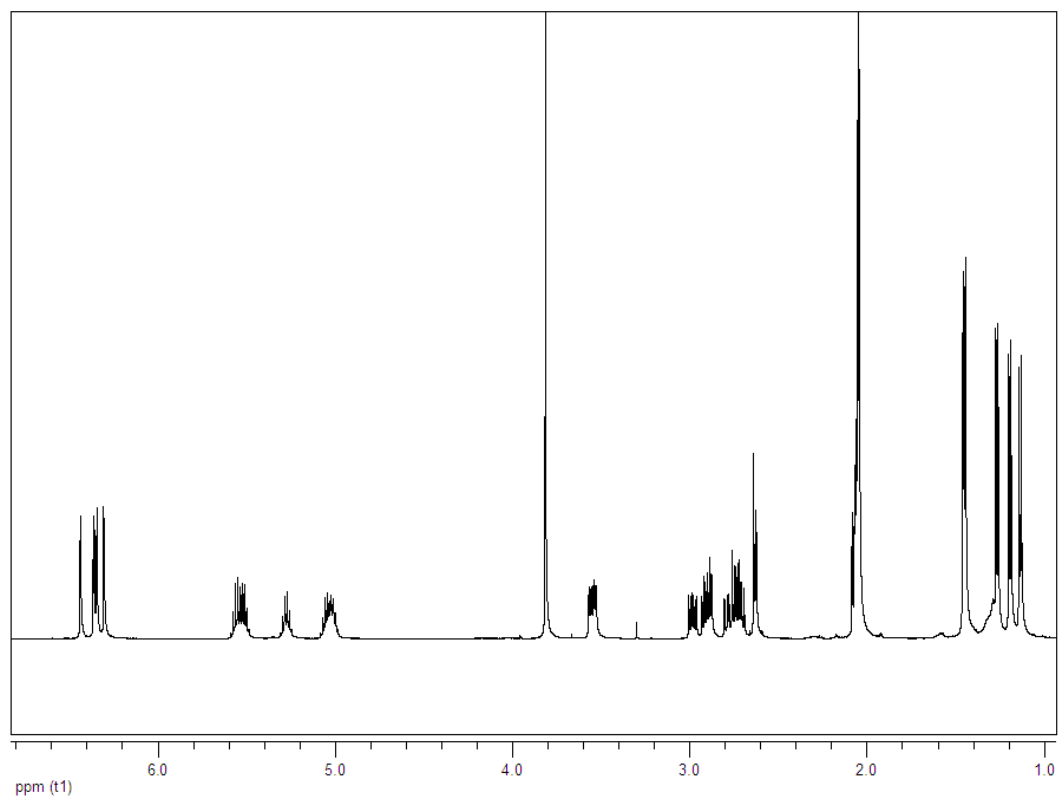

**Figure S2.**  $^{13}\text{C}$  NMR (500 MHz, acetone- $d_6$ ) spectrum of calcaride A (**6**).

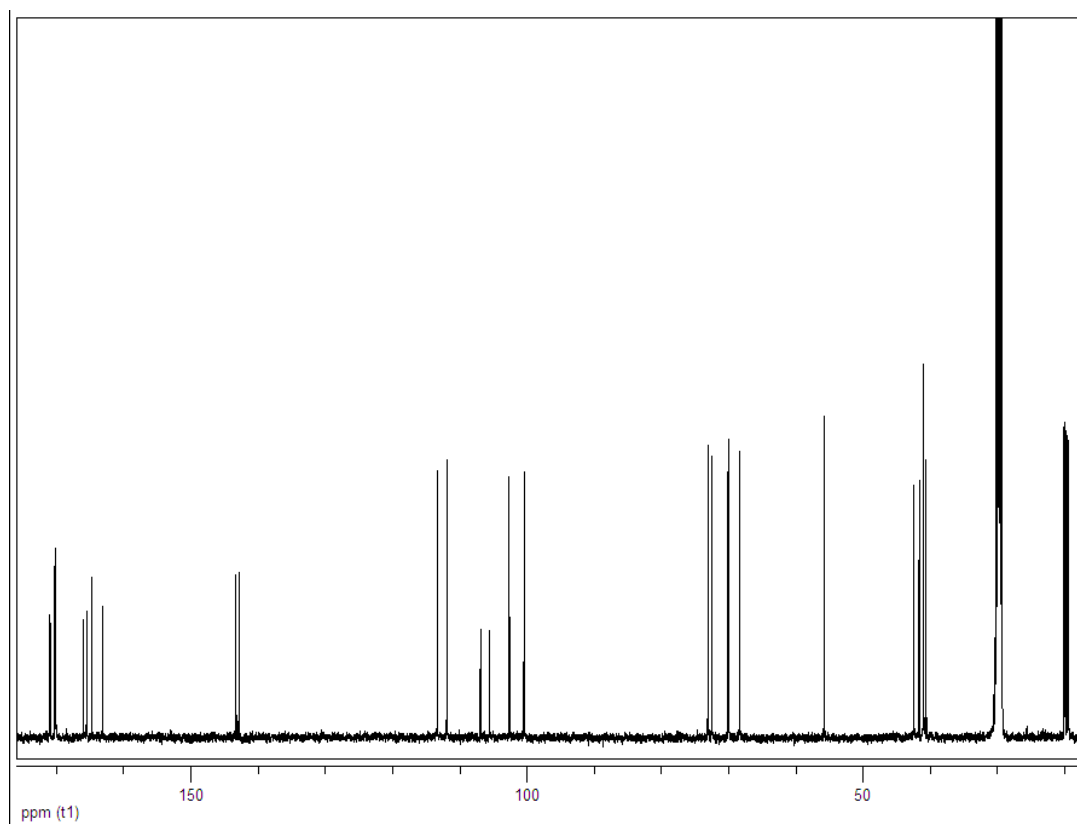

**Figure S3.** COSY (500 MHz, acetone- $d_6$ ) spectrum of calcaride A (6).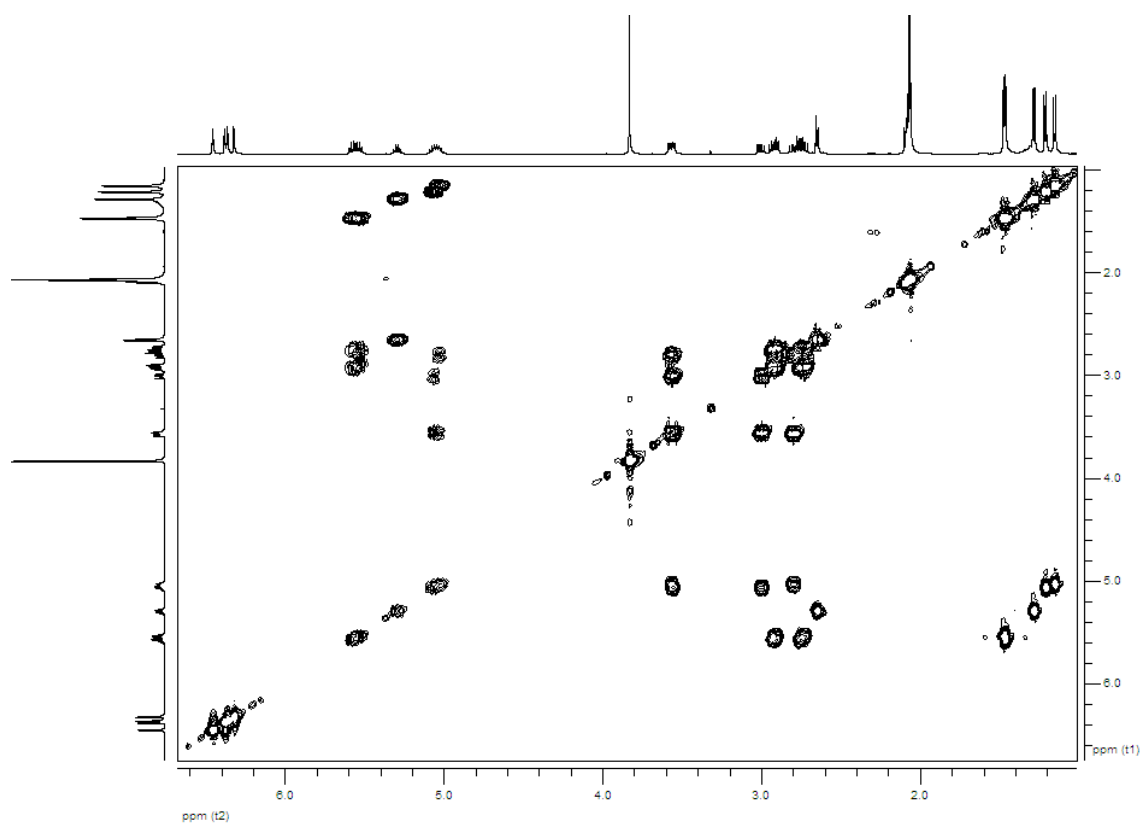**Figure S4.** HSQC (500 MHz, acetone- $d_6$ ) spectrum of calcaride A (6).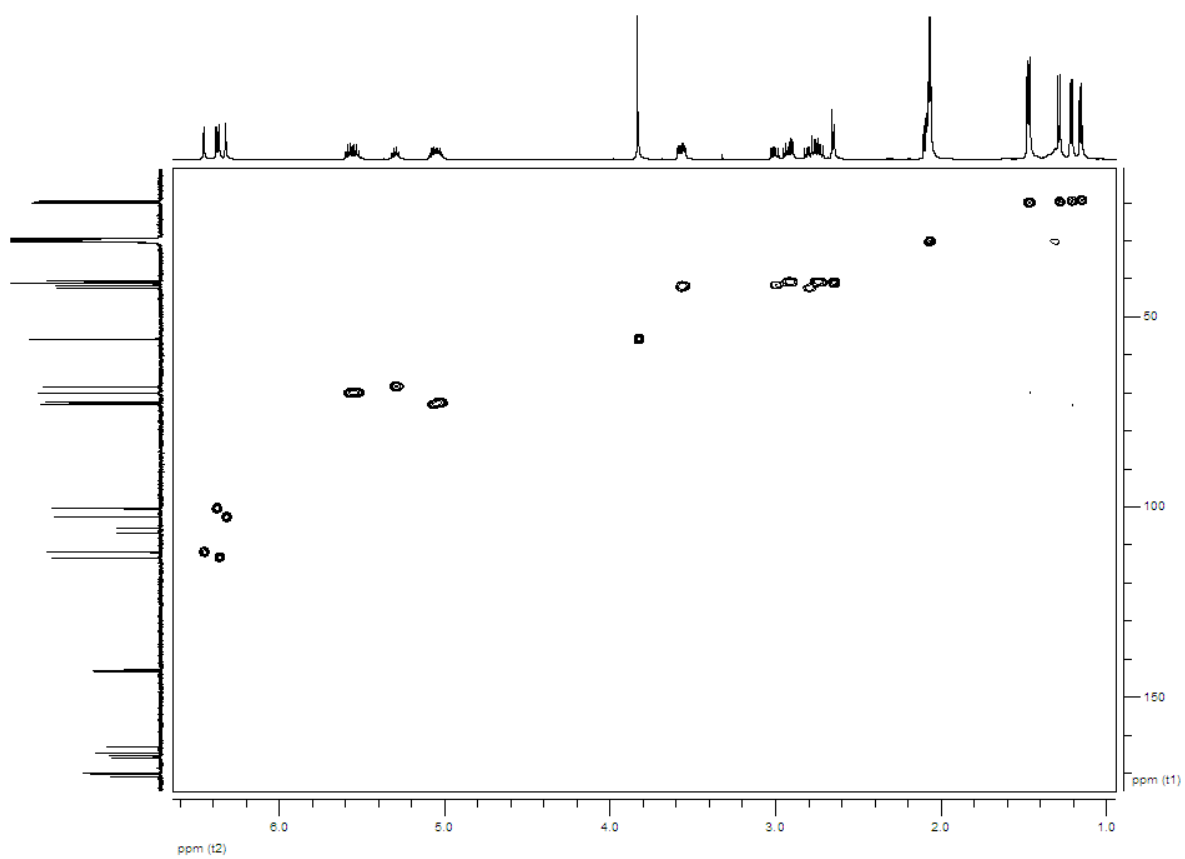

**Figure S5.** HMBC (500 MHz, acetone- $d_6$ ) spectrum of calcaride A (6).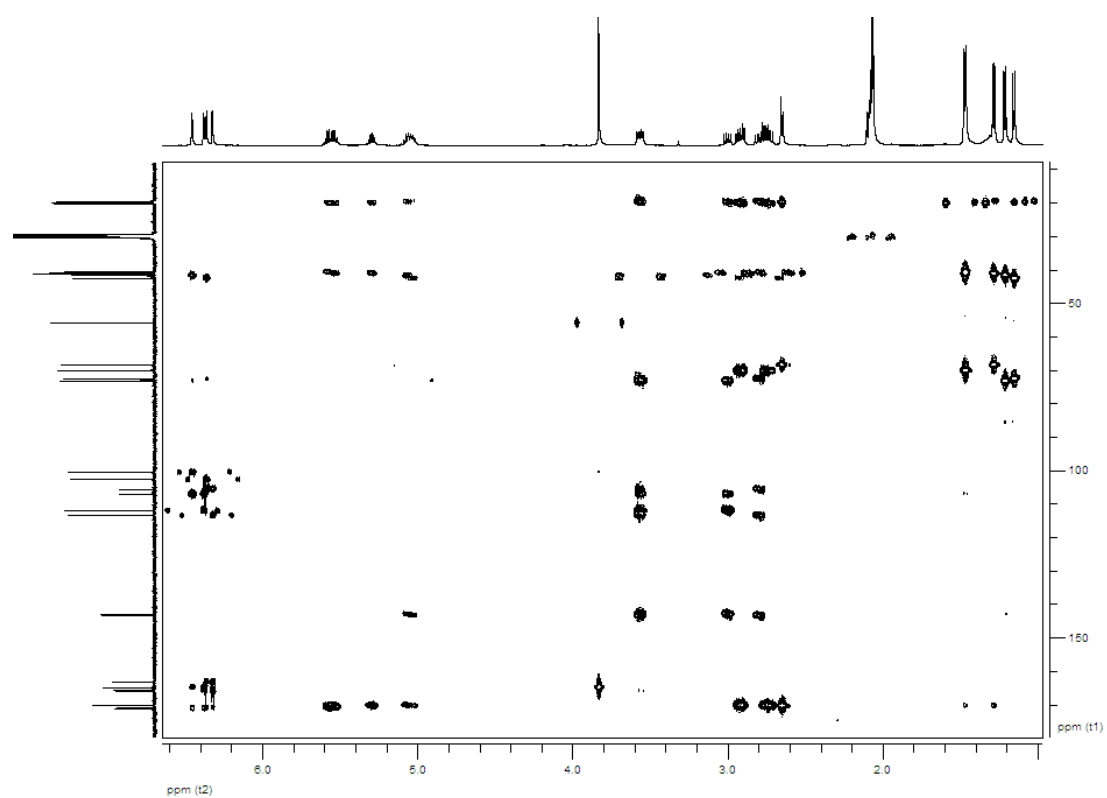**Figure S6.**  $^1\text{H}$  NMR (500 MHz, methanol- $d_4$ ) spectrum of calcaride B (7).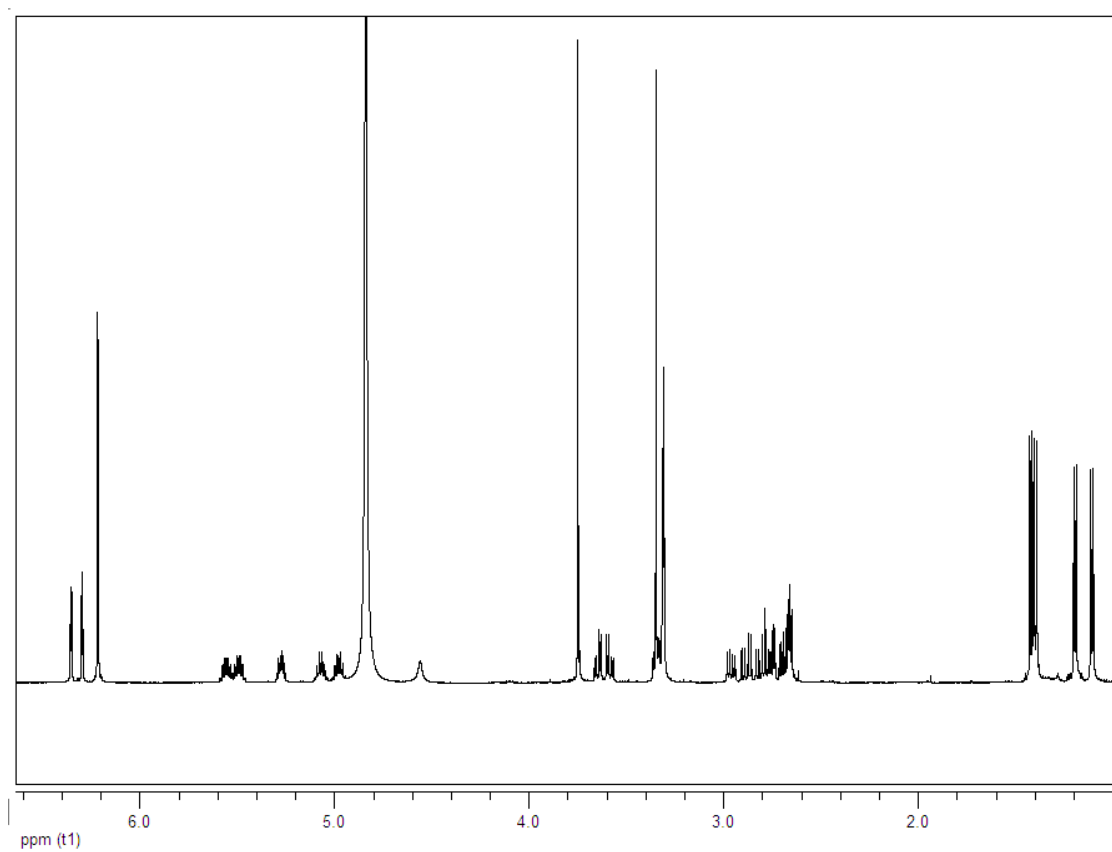

**Figure S7.**  $^1\text{H}$  NMR (500 MHz, methanol- $d_4$ ) spectrum of calcaride C (**8**).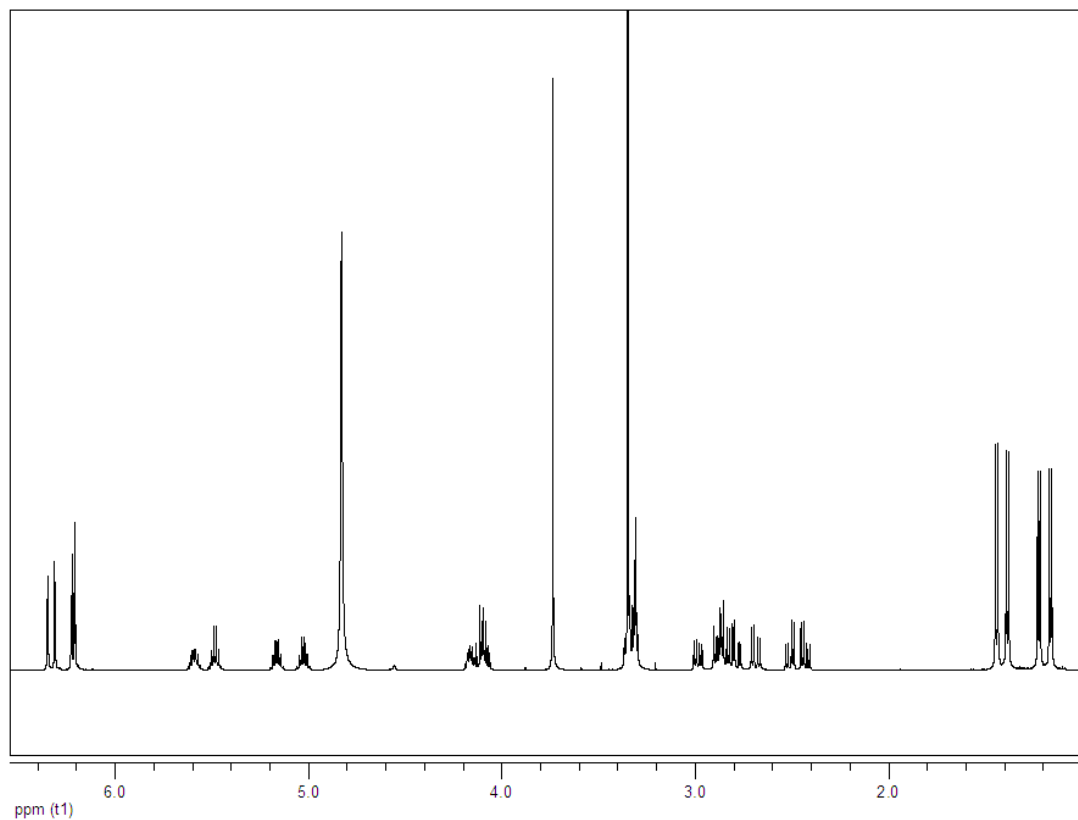**Figure S8.**  $^1\text{H}$  NMR (500 MHz, methanol- $d_4$ ) spectrum of calcaride D (**9**).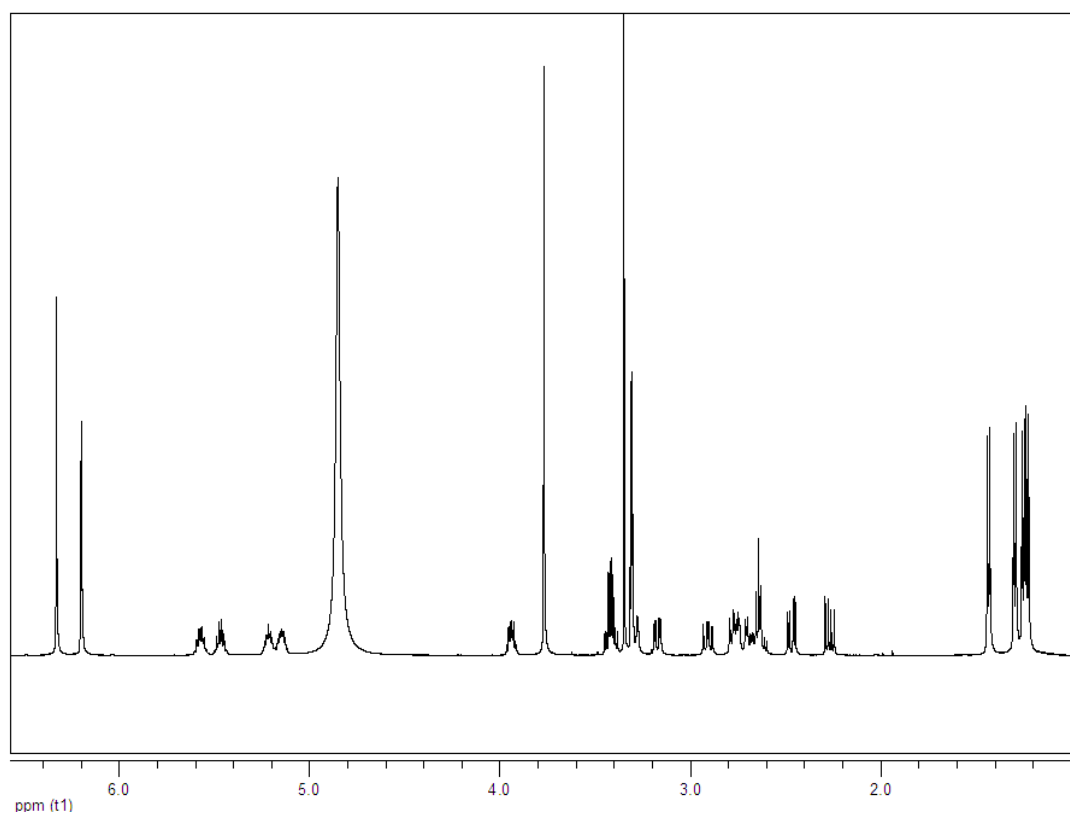

**Figure S9.**  $^1\text{H}$  NMR (600 MHz, methanol- $d_4$ ) spectrum of calcaride E (**10**).

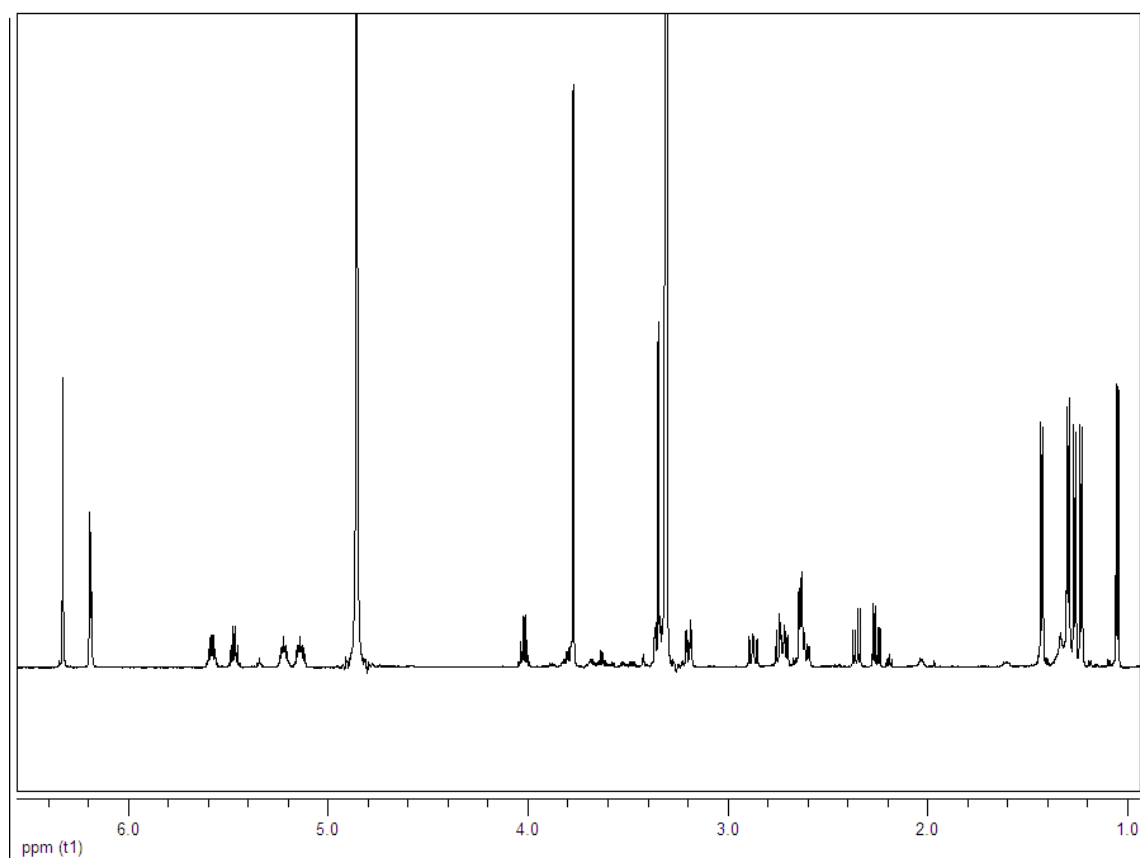

**Table S1.** NMR spectroscopic data (500 MHz, methanol-*d*<sub>4</sub>) of calcaride B (7).

| Position         | $\delta_C$ , Type      | $\delta_H$ , Mult. (J in Hz) | COSY               | HMBC                       |
|------------------|------------------------|------------------------------|--------------------|----------------------------|
| 1                | 171.5, C <sup>a</sup>  |                              |                    |                            |
| 2a               | 41.0, CH <sub>2</sub>  | 2.88, dd (7.7, 16.6)         | 2b, 3              | 1, 3, 4, 5                 |
| 2b               |                        | 2.73, d (5.3, 16.6)          | 2a, 3              | 1, 3, 4, 5                 |
| 3                | 70.2, CH               | 5.56, m                      | 2a, 2b, 4          | 2, 4, 5                    |
| 4                | 20.2, CH <sub>3</sub>  | 1.42, d (6.3)                | 3                  | 2, 3                       |
| 5                | 171.13, C              |                              |                    |                            |
| 6                | 108.7, C               |                              |                    |                            |
| 7                | 164.6, C               |                              |                    |                            |
| 8                | 100.7, CH              | 6.30, d (2.6)                | 10                 | 5, 6, 7, 10                |
| 9                | 164.9, C               |                              |                    |                            |
| OCH <sub>3</sub> | 55.8, CH <sub>3</sub>  | 3.75, s                      |                    | 9                          |
| 10               | 111.5, CH              | 6.36, d (2.6)                | 8                  | 5, 6, 8, 9, 12             |
| 11               | 142.6, C               |                              |                    |                            |
| 12a              | 41.8, CH <sub>2</sub>  | 3.34 <sup>b</sup>            | 12b, 13            | 6, 10, 11, 13, 14          |
| 12b              |                        | 2.96, dd (6.4, 13.8)         | 12a, 13            | 6, 10, 11, 13, 14          |
| 13               | 73.6, CH               | 5.07, m                      | 12a, 12b, 14       | 11, 12, 14, 15             |
| 14               | 20.0, CH <sub>3</sub>  | 1.20, d (6.2)                | 13                 | 12, 13                     |
| 15               | 171.37, C <sup>a</sup> |                              |                    |                            |
| 16a              | 41.6, CH <sub>2</sub>  | 2.81, dd (7.6, 15.8)         | 16b, 17            | 15, 17, 18                 |
| 16b              |                        | 2.67, dd (5.7, 15.8)         | 16a, 17            | 15, 17, 18                 |
| 17               | 70.4, CH               | 5.49, m                      | 16a, 16b, 18       | 16, 18, 19                 |
| 18               | 20.2, CH <sub>3</sub>  | 1.40, d (6.4)                | 17                 | 16, 17                     |
| 19               | 171.07, C              |                              |                    |                            |
| 20               | 106.7, C               |                              |                    |                            |
| 21               | 165.4, C               |                              |                    |                            |
| 22               | 102.8, CH              | 6.22, s                      |                    | 19, 20, 21, 23, 24, 26     |
| 23               | 163.5, C               |                              |                    |                            |
| 24               | 113.3, CH              | 6.22, s                      |                    | 19, 20, 21, 22, 23, 26, 27 |
| 25               | 143.2, C               |                              |                    |                            |
| 26a              | 42.3, CH <sub>2</sub>  | 3.32 <sup>b</sup>            | 26b, 27            | 20, 24, 25, 27, 28         |
| 26b              |                        | 2.77, dd (8.1, 13.3)         | 26a, 27            | 20, 24, 25, 27, 28         |
| 27               | 73.5, CH               | 4.98, m                      | 26a, 26b, 28       | 25, 26, 29                 |
| 28               | 19.5, CH <sub>3</sub>  | 1.11, d (6.2)                | 27                 | 26, 27                     |
| 29               | 171.43, C <sup>a</sup> |                              |                    |                            |
| 30a              | 36.7, CH <sub>2</sub>  | 2.68, dd (5.1, 16.7)         | 30b, 31            | 29, 31, 32                 |
| 30b              |                        | 2.64, dd (8.1, 16.7)         | 30a, 31            | 29, 31, 32                 |
| 31               | 72.7, CH               | 5.28, m                      | 30a, 30b, 32a, 32b | 1, 29, 30                  |
| 32a              | 63.6, CH <sub>2</sub>  | 3.65, dd (4.5, 11.9)         | 31, 32b            | 30, 31                     |
| 32b              |                        | 3.58, dd (5.1, 11.9)         | 31, 32a            | 30, 31                     |

<sup>a</sup> Assignments of C-1, C-15 and C-29 are interchangeable; <sup>b</sup> Signal partially obscured and deduced from the HMBC NMR spectrum.

**Table S2.** NMR spectroscopic data (500 MHz, methanol-*d*<sub>4</sub>) of calcaride C (**8**).

| Position                      | $\delta_C$ , Type                  | $\delta_H$ , Mult. (J in Hz) | COSY               | HMBC                   |
|-------------------------------|------------------------------------|------------------------------|--------------------|------------------------|
| 1                             | 171.6, C                           |                              |                    |                        |
| 2a                            | 41.2, CH <sub>2</sub>              | 2.878, dd (8.1, 16.2)        | 2b, 3              | 1, 3, 4                |
| 2b                            |                                    | 2.79, dd (4.8, 16.2)         | 2a, 3              | 1, 3, 4                |
| 3                             | 70.5, CH                           | 5.59, m                      | 2a, 2b, 4          | 2, 4, 5                |
| 4                             | 20.2, CH <sub>3</sub>              | 1.44, d (6.4)                | 3                  | 2, 3                   |
| 5                             | 171.53, C <sup>a</sup>             |                              |                    |                        |
| 6                             | 108.2, C                           |                              |                    |                        |
| 7                             | 165.08, C <sup>a</sup>             |                              |                    |                        |
| 8                             | 100.7, CH                          | 6.31, d (2.6)                | 10                 | 5, 6, 7, 9, 10, 12     |
| 9                             | 165.0, C <sup>a</sup>              |                              |                    |                        |
| OCH <sub>3</sub> <sup>b</sup> | 55.8, CH <sub>3</sub>              | 3.74, s                      |                    | 9 (or 7)               |
| 10                            | 111.3, CH                          | 6.35, d (2.6)                | 8                  | 5, 6, 7, 8, 9, 12      |
| 11                            | 142.7, C                           |                              |                    |                        |
| 12a                           | 41.7, CH <sub>2</sub>              | 3.35 <sup>c</sup>            | 12b, 13            | 6, 10, 11, 13, 14      |
| 12b                           |                                    | 2.99, dd (6.6, 14.0)         | 12a, 13            | 6, 10, 11, 13, 14      |
| 13                            | 73.2, CH                           | 5.16, m                      | 12a, 12b, 14       | 11, 12, 14, 15         |
| 14                            | 20.0, CH <sub>3</sub>              | 1.22, d (6.2)                | 13                 | 12, 13                 |
| 15                            | 171.3, C <sup>a</sup>              |                              |                    |                        |
| 16a                           | 41.6, CH <sub>2</sub> <sup>a</sup> | 2.85, dd (6.6, 16.0)         | 16b, 17            | 15, 17, 18             |
| 16b                           |                                    | 2.69, dd (6.6, 16.0)         | 16a, 17            | 15, 17, 18             |
| 17                            | 70.3, CH                           | 5.48, m                      | 16a, 16b, 18       | 16, 18, 19             |
| 18                            | 20.1, CH <sub>3</sub>              | 1.39, d (6.3)                | 17                 | 16, 17                 |
| 19                            | 171.48, C <sup>a</sup>             |                              |                    |                        |
| 20                            | 107.3, C                           |                              |                    |                        |
| 21                            | 165.14, C <sup>a</sup>             |                              |                    |                        |
| 22                            | 102.7, CH                          | 6.21, d (2.5)                |                    | 19, 20, 21, 23, 24, 26 |
| 23                            | 163.4, C                           |                              |                    |                        |
| 24                            | 112.6, CH                          | 6.23, d (2.5)                |                    | 19, 20, 21, 22, 23, 26 |
| 25                            | 143.1, C                           |                              |                    |                        |
| 26a                           | 41.5, CH <sub>2</sub> <sup>a</sup> | 3.31 <sup>c</sup>            | 26b, 27            | 20, 24, 25, 27, 28     |
| 26b                           |                                    | 2.885, dd (6.9, 13.4)        | 26a, 27            | 20, 24, 25, 27, 28     |
| 27                            | 73.6, CH                           | 5.03, m                      | 26a, 26b, 28       | 25, 26, 28, 29         |
| 28                            | 19.8, CH <sub>3</sub>              | 1.16, d (6.2)                | 27                 | 26, 27                 |
| 29                            | 171.9, C                           |                              |                    |                        |
| 30a                           | 40.4, CH <sub>2</sub>              | 2.51, dd (6.0, 15.3)         | 30b, 31            | 29, 31, 32             |
| 30b                           |                                    | 2.43, dd (7.2, 15.3)         | 30a, 31            | 29, 31, 32             |
| 31                            | 67.1, CH                           | 4.17, m                      | 30a, 30b, 32a, 32b | 29, 30, 32             |
| 32a                           | 68.5, CH <sub>2</sub>              | 4.12, dd (4.8, 11.1)         | 31, 32b            | 1, 30, 31              |
| 32b                           |                                    | 4.08, dd (5.5, 11.1)         | 31, 32a            | 1, 30, 31              |

<sup>a</sup> Assignments of C-5, C-15 and C-19, C-7 and C-21, C-7 and C-9, C-16 and C-26, respectively are interchangeable; <sup>b</sup> Position of the methoxy group could not unambiguously be determined. In analogy to the other calcarides it was assumed to be linked to C-9; <sup>c</sup> Signal partially obscured.



**Table S3.** NMR spectroscopic data (500 MHz, methanol-*d*<sub>4</sub>) of calcaride D (**9**).

| Position         | $\delta_C$ , Type      | $\delta_H$ , Mult. (J in Hz) | COSY               | HMBC                       |
|------------------|------------------------|------------------------------|--------------------|----------------------------|
| 1                | 173.9, C <sup>a</sup>  |                              |                    |                            |
| 2a               | 41.8, CH <sub>2</sub>  | 2.767, dd (7.5, 15.8)        | 2b, 3              | 1, 3, 4                    |
| 2b               |                        | 2.69, dd (5.3, 15.8)         | 2a, 3              | 1, 3, 4                    |
| 3                | 70.8, CH               | 5.57, m                      | 2a, 2b, 4          | 1, 2, 4, 5                 |
| 4                | 20.1, CH <sub>3</sub>  | 1.43, d (6.4)                | 3                  | 2, 3                       |
| 5                | 171.5, C <sup>b</sup>  |                              |                    |                            |
| 6                | 107.2, C               |                              |                    |                            |
| 7                | 166.0, C <sup>b</sup>  |                              |                    |                            |
| 8                | 100.8, CH              | 6.33, s                      |                    | 5, 6, 7, 9, 10             |
| 9                | 165.0, C <sup>b</sup>  |                              |                    |                            |
| OCH <sub>3</sub> | 55.9, CH <sub>3</sub>  | 3.77, s                      |                    | 9                          |
| 10               | 112.8, CH              | 6.33, s                      |                    | 5, 6, 7, 8, 9, 12, 13      |
| 11               | 143.2, C               |                              |                    |                            |
| 12a              | 43.2, CH <sub>2</sub>  | 3.29 <sup>c</sup>            | 12b, 13            | 6, 10, 11, 13, 14          |
| 12b              |                        | 2.91, dd (9.7, 13.7)         | 12a, 13            | 6, 10, 11, 13, 14          |
| 13               | 73.1, CH               | 5.22, m                      | 12a, 12b, 14       | 11, 12, 14, 15             |
| 14               | 20.52, CH <sub>3</sub> | 1.25, d (6.2)                | 13                 | 11, 12, 13                 |
| 15               | 171.2, C               |                              |                    |                            |
| 16a              | 41.8, CH <sub>2</sub>  | 2.66, dd (7.2, 15.7)         | 16b, 17            | 15, 17, 18                 |
| 16b              |                        | 2.62, dd (5.8, 15.7)         | 16a, 17            | 15, 17, 18                 |
| 17               | 70.0, CH               | 5.47, m                      | 16a, 16b, 18       | 16, 18, 19                 |
| 18               | 19.9, CH <sub>3</sub>  | 1.30, d (6.4)                | 17                 | 15, 16, 17                 |
| 19               | 171.6, C <sup>b</sup>  |                              |                    |                            |
| 20               | 105.8, C               |                              |                    |                            |
| 21               | 166.2, C               |                              |                    |                            |
| 22               | 102.7, CH              | 6.203, d (2.6)               |                    | 20, 21, 23, 24             |
| 23               | 163.5, C               |                              |                    |                            |
| 24               | 113.8, CH              | 6.197, d (2.6)               |                    | 19, 20, 21, 22, 23, 26, 27 |
| 25               | 143.7, C               |                              |                    |                            |
| 26a              | 43.5, CH <sub>2</sub>  | 3.17, dd (4.0, 13.4)         | 26b, 27            | 20, 24, 25, 27, 28         |
| 26b              |                        | 2.772, dd (9.2, 13.4)        | 26a, 27            | 20, 24, 25, 27, 28         |
| 27               | 72.7, CH               | 5.15, m                      | 26a, 26b, 28       | 25, 26, 28, 29             |
| 28               | 20.49, CH <sub>3</sub> | 1.23, d (6.2)                | 27                 | 25, 26, 27                 |
| 29               | 172.7, C               |                              |                    |                            |
| 30a              | 39.9, CH <sub>2</sub>  | 2.47, dd (5.2, 15.4)         | 30b, 31            | 29, 31, 32                 |
| 30b              |                        | 2.27, dd (7.9, 15.4)         | 30a, 31            | 29, 31, 32                 |
| 31               | 69.9, CH               | 3.94, m                      | 30a, 30b, 32a, 32b | 29, 30, 32                 |
| 32a              | 66.4, CH <sub>2</sub>  | 3.44, dd (4.9, 11.2)         | 31, 32b            | 30, 31                     |
| 32b              |                        | 3.40, dd (5.7, 11.2)         | 31, 32a            | 30, 31                     |

<sup>a</sup> Signal deduced from the HMBC NMR spectrum; <sup>b</sup> Assignments of C-5 and C-19, C-7 and C-9, respectively are interchangeable; <sup>c</sup> Signal partially obscured and deduced from the HSQC NMR spectrum.

**Table S4.** NMR spectroscopic data (600 MHz, methanol-*d*<sub>4</sub>) of calcaride E (**10**).

| Position         | $\delta_C$ , Type      | $\delta_H$ , Mult. (J in Hz)      | COSY         | HMBC                  |
|------------------|------------------------|-----------------------------------|--------------|-----------------------|
| 1                | 175.9, C <sup>a</sup>  |                                   |              |                       |
| 2a               | 43.3, CH <sub>2</sub>  | 2.72, dd (7.8, 15.4)              | 2b, 3        | 1, 3, 4               |
| 2b               |                        | 2.61, dd (5.9, 15.4) <sup>b</sup> | 2a, 3        | 1, 3, 4               |
| 3                | 71.5, CH               | 5.58, m                           | 2a, 2b, 4    | 1, 2, 4, 5            |
| 4                | 20.3, CH <sub>3</sub>  | 1.43, d (6.3)                     | 3            | 2, 3                  |
| 5                | 171.56, C <sup>c</sup> |                                   |              |                       |
| 6                | 107.3, C               |                                   |              |                       |
| 7                | 166.0, C <sup>c</sup>  |                                   |              |                       |
| 8                | 100.8, CH              | 6.33, s                           |              | 5, 6, 7, 9, 10        |
| 9                | 165.0, C <sup>c</sup>  |                                   |              |                       |
| OCH <sub>3</sub> | 55.9, CH <sub>3</sub>  | 3.77, s                           |              | 9                     |
| 10               | 112.8, CH              | 6.33, s                           |              | 5, 6, 7, 8, 9, 12, 13 |
| 11               | 143.3, C               |                                   |              |                       |
| 12a              | 43.4, CH <sub>2</sub>  | 3.35, dd (3.5, 13.6) <sup>b</sup> | 12b, 13      | 6, 10, 11, 13         |
| 12b              |                        | 2.87, dd (9.8, 13.6)              | 12a, 13      | 6, 10, 11, 13, 14     |
| 13               | 73.2, CH               | 5.22, m                           | 12a, 12b, 14 | 11, 15                |
| 14               | 20.6, CH <sub>3</sub>  | 1.26, d (6.3)                     | 13           | 11, 12, 13            |
| 15               | 171.2, C               |                                   |              |                       |
| 16a              | 41.8, CH <sub>2</sub>  | 2.65, dd (7.2, 15.6)              | 16b, 17      | 15, 17, 18            |
| 16b              |                        | 2.62, dd (6.0, 15.6)              | 16a, 17      | 15, 17, 18            |
| 17               | 70.0, CH               | 5.47, m                           | 16a, 16b, 18 | 15, 16, 18, 19        |
| 18               | 19.9, CH <sub>3</sub>  | 1.30, d (6.3)                     | 17           | 15, 16, 17            |
| 19               | 171.62, C <sup>c</sup> |                                   |              |                       |
| 20               | 105.7, C               |                                   |              |                       |
| 21               | 166.3, C               |                                   |              |                       |
| 22               | 102.7, CH              | 6.19, d (2.5)                     |              | 19, 21, 20, 23, 24    |
| 23               | 163.6, C               |                                   |              |                       |
| 24               | 113.9, CH              | 6.18, d (2.5)                     |              | 20, 21, 22, 23, 26    |
| 25               | 143.7, C               |                                   |              |                       |
| 26a              | 43.6, CH <sub>2</sub>  | 3.20, dd (3.8, 13.5)              | 26b, 27      | 20, 24, 25, 27, 28    |
| 26b              |                        | 2.74, dd (9.5, 13.5)              | 26a, 27      | 20, 24, 25, 27, 28    |
| 27               | 72.6, CH               | 5.14, m                           | 26a, 26b, 28 | 25, 29                |
| 28               | 20.6, CH <sub>3</sub>  | 1.23, d (6.2)                     | 27           | 25, 26, 27            |
| 29               | 172.5, C               |                                   |              |                       |
| 30a              | 45.1, CH <sub>2</sub>  | 2.36, dd (6.9, 14.7)              | 30b, 31      | 29, 31, 32            |
| 30b              |                        | 2.26, dd (6.5, 14.7)              | 30a, 31      | 29, 31, 32            |
| 31               | 65.4, CH               | 4.02, m                           | 30a, 30b, 32 | 29, 30, 32            |
| 32               | 23.0, CH <sub>3</sub>  | 1.05, d (6.2)                     | 31           | 30, 31                |

<sup>a</sup> Signal deduced from the HMBC NMR spectrum; <sup>b</sup> Signal partially obscured; <sup>c</sup> Assignments of C-5 and C-19, C-7 and C-9, respectively are interchangeable.
