# Supplementary material for: Calcarides A–E, Antibacterial Macrocyclic and Linear Polyesters from a Calcarisporium Strain
Source: MDPI journal article supplement (doi:10.3390/md11093309), 2013-08-29
Supplement: s2 [file s2]

marinedrugs-11-03309-s001.mol
  corina  12171322123D 1   1.00000     0.00000 
CORINA 3.49 0023  12.04.2013
 47 49  0  0  0  0  0  0  0  0999 V2000
   -0.0178    1.4646    0.0101 C   0  0  0  0  0  0  0  0  0  0  0  0
    0.0021   -0.0041    0.0020 C   0  0  0  0  0  0  0  0  0  0  0  0
   -1.1360   -0.6906   -0.2434 O   0  0  0  0  0  0  0  0  0  0  0  0
    2.5192    1.5976    0.0014 C   0  0  0  0  0  0  0  0  0  0  0  0
    1.1521    2.2233    0.0030 C   0  0  0  0  0  0  0  0  0  0  0  0
    3.9047    0.5362    1.7181 O   0  0  0  0  0  0  0  0  0  0  0  0
    3.1584    1.7324    1.3835 C   0  0  0  0  0  0  0  0  0  0  0  0
    6.0820   -0.5263    2.1789 C   0  0  0  0  0  0  0  0  0  0  0  0
    5.2358    0.5558    1.5580 C   0  0  0  0  0  0  0  0  0  0  0  0
    7.8468   -2.1292    1.6628 O   0  0  0  0  0  0  0  0  0  0  0  0
    7.2744   -0.8519    1.2833 C   0  0  0  0  0  0  0  0  0  0  0  0
    5.6963   -5.7844    0.9050 C   0  0  0  0  0  0  0  0  0  0  0  0
    7.1213   -5.7573    1.3821 C   0  0  0  0  0  0  0  0  0  0  0  0
    7.8297   -4.5671    1.5555 C   0  0  0  0  0  0  0  0  0  0  0  0
    7.2579   -3.2565    1.2173 C   0  0  0  0  0  0  0  0  0  0  0  0
    7.7381   -6.9588    1.6205 C   0  0  0  0  0  0  0  0  0  0  0  0
    9.0421   -7.0105    2.0921 C   0  0  0  0  0  0  0  0  0  0  0  0
    9.7424   -5.8359    2.3283 C   0  0  0  0  0  0  0  0  0  0  0  0
    9.1439   -4.6163    2.0655 C   0  0  0  0  0  0  0  0  0  0  0  0
    1.0797    3.5926   -0.0214 C   0  0  0  0  0  0  0  0  0  0  0  0
   -0.1499    4.2387   -0.0163 C   0  0  0  0  0  0  0  0  0  0  0  0
   -1.3248    3.5014    0.0191 C   0  0  0  0  0  0  0  0  0  0  0  0
   -1.2667    2.1174    0.0389 C   0  0  0  0  0  0  0  0  0  0  0  0
   -1.0044   -2.1246   -0.4280 C   0  0  0  0  0  0  0  0  0  0  0  0
   -1.0658   -2.8290    0.9268 C   0  0  0  0  0  0  0  0  0  0  0  0
   -0.5973   -4.2572    0.7725 C   0  0  0  0  0  0  0  0  0  0  0  0
    0.4023   -4.5386   -0.0661 O   0  0  0  0  0  0  0  0  0  0  0  0
    1.1236   -6.5745    1.0854 C   0  0  0  0  0  0  0  0  0  0  0  0
    2.5806   -6.9640    1.1584 C   0  0  0  0  0  0  0  0  0  0  0  0
    3.4370   -6.1176    1.7434 O   0  0  0  0  0  0  0  0  0  0  0  0
    4.8179   -6.5207    1.9209 C   0  0  0  0  0  0  0  0  0  0  0  0
    5.7424    1.4390    0.9092 O   0  0  0  0  0  0  0  0  0  0  0  0
    6.2703   -3.1578    0.5166 O   0  0  0  0  0  0  0  0  0  0  0  0
    2.9570   -8.0115    0.6981 O   0  0  0  0  0  0  0  0  0  0  0  0
   -1.1341   -5.1202    1.4272 O   0  0  0  0  0  0  0  0  0  0  0  0
    1.0211   -0.6240    0.2350 O   0  0  0  0  0  0  0  0  0  0  0  0
   -2.4174    1.4003    0.0893 O   0  0  0  0  0  0  0  0  0  0  0  0
   -0.2074    5.5947   -0.0506 O   0  0  0  0  0  0  0  0  0  0  0  0
    9.8350   -3.4712    2.2982 O   0  0  0  0  0  0  0  0  0  0  0  0
    9.6373   -8.2080    2.3261 O   0  0  0  0  0  0  0  0  0  0  0  0
    2.0735    1.9488    2.4439 C   0  0  0  0  0  0  0  0  0  0  0  0
    8.3506    0.2270    1.4395 C   0  0  0  0  0  0  0  0  0  0  0  0
   -2.1328   -2.6269   -1.3295 C   0  0  0  0  0  0  0  0  0  0  0  0
    5.2524   -6.1536    3.3430 C   0  0  0  0  0  0  0  0  0  0  0  0
    0.8370   -5.9041   -0.2556 C   0  0  0  0  0  0  0  0  0  0  0  0
   -0.2273   -6.6959   -1.0181 C   0  0  0  0  0  0  0  0  0  0  0  0
   -0.3626   -6.1640   -2.3375 O   0  0  0  0  0  0  0  0  0  0  0  0
  1  2  1  0      
  2  3  1  0      
  4  5  1  0      
  5  1  1  0      
  6  7  1  0      
  7  4  1  0      
  8  9  1  0      
  9  6  1  0      
 10 11  1  0      
 11  8  1  0      
 12 13  1  0      
 13 14  1  0      
 14 15  1  0      
 15 10  1  0      
 13 16  2  0      
 16 17  1  0      
 17 18  2  0      
 18 19  1  0      
 19 14  2  0      
  5 20  2  0      
 20 21  1  0      
 21 22  2  0      
 22 23  1  0      
 23  1  2  0      
  3 24  1  0      
 24 25  1  0      
 25 26  1  0      
 26 27  1  0      
 28 29  1  0      
 29 30  1  0      
 30 31  1  0      
 31 12  1  0      
  9 32  2  0      
 15 33  2  0      
 29 34  2  0      
 26 35  2  0      
  2 36  2  0      
 23 37  1  0      
 21 38  1  0      
 19 39  1  0      
 17 40  1  0      
  7 41  1  0      
 11 42  1  0      
 24 43  1  0      
 31 44  1  0      
 27 45  1  0      
 45 28  1  0      
 45 46  1  0      
 46 47  1  0      
M  END
$$$$
