# Supplementary material for: Calcarides A–E, Antibacterial Macrocyclic and Linear Polyesters from a Calcarisporium Strain
Source: MDPI journal article supplement (doi:10.3390/md11093309), 2013-08-29
Supplement: s4 [file s4]

marinedrugs-11-03309-s002.mol
  corina  12171322123D 1   1.00000     0.00000 
CORINA 3.49 0023  12.04.2013
 48 49  0  0  0  0  0  0  0  0999 V2000
    4.1754   -2.3120   -2.7094 C   0  0  0  0  0  0  0  0  0  0  0  0
    3.6477   -3.3874   -3.5639 C   0  0  0  0  0  0  0  0  0  0  0  0
    2.3165   -3.5640   -3.6801 O   0  0  0  0  0  0  0  0  0  0  0  0
    4.2822   -0.8217   -4.7347 C   0  0  0  0  0  0  0  0  0  0  0  0
    4.4872   -1.0649   -3.2616 C   0  0  0  0  0  0  0  0  0  0  0  0
    1.8685   -1.0695   -4.5278 O   0  0  0  0  0  0  0  0  0  0  0  0
    2.9189   -0.1641   -4.9582 C   0  0  0  0  0  0  0  0  0  0  0  0
   -0.4153   -1.3918   -3.6470 C   0  0  0  0  0  0  0  0  0  0  0  0
    0.7193   -0.5152   -4.1108 C   0  0  0  0  0  0  0  0  0  0  0  0
   -2.0261   -0.3464   -5.1445 O   0  0  0  0  0  0  0  0  0  0  0  0
   -1.3966   -1.6089   -4.8006 C   0  0  0  0  0  0  0  0  0  0  0  0
   -5.3382    0.1882   -6.3495 C   0  0  0  0  0  0  0  0  0  0  0  0
   -4.4205    1.2814   -6.8331 C   0  0  0  0  0  0  0  0  0  0  0  0
   -3.0372    1.0735   -6.8553 C   0  0  0  0  0  0  0  0  0  0  0  0
   -2.4758   -0.2110   -6.4079 C   0  0  0  0  0  0  0  0  0  0  0  0
   -4.9405    2.4715   -7.2541 C   0  0  0  0  0  0  0  0  0  0  0  0
   -4.1010    3.4872   -7.7025 C   0  0  0  0  0  0  0  0  0  0  0  0
   -2.7268    3.2997   -7.7258 C   0  0  0  0  0  0  0  0  0  0  0  0
   -2.1871    2.0954   -7.3068 C   0  0  0  0  0  0  0  0  0  0  0  0
    4.9764   -0.0679   -2.4676 C   0  0  0  0  0  0  0  0  0  0  0  0
    5.1695   -0.2831   -1.1060 C   0  0  0  0  0  0  0  0  0  0  0  0
    4.8665   -1.5138   -0.5425 C   0  0  0  0  0  0  0  0  0  0  0  0
    4.3628   -2.5312   -1.3355 C   0  0  0  0  0  0  0  0  0  0  0  0
    1.8683   -4.7056   -4.4573 C   0  0  0  0  0  0  0  0  0  0  0  0
    0.4967   -5.1590   -3.9532 C   0  0  0  0  0  0  0  0  0  0  0  0
   -4.4181    0.3025   -4.0977 O   0  0  0  0  0  0  0  0  0  0  0  0
   -5.6464    0.4001   -4.8659 C   0  0  0  0  0  0  0  0  0  0  0  0
    0.5946    0.6866   -4.1073 O   0  0  0  0  0  0  0  0  0  0  0  0
   -2.4175   -1.1498   -7.1776 O   0  0  0  0  0  0  0  0  0  0  0  0
    4.4122   -4.1165   -4.1650 O   0  0  0  0  0  0  0  0  0  0  0  0
    4.0646   -3.7368   -0.7903 O   0  0  0  0  0  0  0  0  0  0  0  0
    5.6567    0.7153   -0.3267 O   0  0  0  0  0  0  0  0  0  0  0  0
   -0.8440    1.9062   -7.3267 O   0  0  0  0  0  0  0  0  0  0  0  0
   -4.6293    4.6657   -8.1191 O   0  0  0  0  0  0  0  0  0  0  0  0
    2.7427    0.1517   -6.4448 C   0  0  0  0  0  0  0  0  0  0  0  0
   -2.4687   -2.6144   -4.3758 C   0  0  0  0  0  0  0  0  0  0  0  0
    1.7645   -4.3098   -5.9316 C   0  0  0  0  0  0  0  0  0  0  0  0
   -6.6311   -0.6706   -4.3916 C   0  0  0  0  0  0  0  0  0  0  0  0
    0.6250   -5.6734   -2.5425 C   0  0  0  0  0  0  0  0  0  0  0  0
   -0.4727   -6.0207   -1.8524 O   0  0  0  0  0  0  0  0  0  0  0  0
   -4.3839    0.9442   -2.9192 C   0  0  0  0  0  0  0  0  0  0  0  0
   -3.1831    0.8038   -2.0195 C   0  0  0  0  0  0  0  0  0  0  0  0
   -3.3403    1.7291   -0.8112 C   0  0  0  0  0  0  0  0  0  0  0  0
   -5.3158    1.6343   -2.5797 O   0  0  0  0  0  0  0  0  0  0  0  0
    1.7158   -5.7733   -2.0327 O   0  0  0  0  0  0  0  0  0  0  0  0
   -3.3167    3.0898   -1.2470 O   0  0  0  0  0  0  0  0  0  0  0  0
   -2.1906    1.4876    0.1691 C   0  0  0  0  0  0  0  0  0  0  0  0
   -2.3980    2.2681    1.3480 O   0  0  0  0  0  0  0  0  0  0  0  0
  1  2  1  0      
  2  3  1  0      
  4  5  1  0      
  5  1  1  0      
  6  7  1  0      
  7  4  1  0      
  8  9  1  0      
  9  6  1  0      
 10 11  1  0      
 11  8  1  0      
 12 13  1  0      
 13 14  1  0      
 14 15  1  0      
 15 10  1  0      
 13 16  2  0      
 16 17  1  0      
 17 18  2  0      
 18 19  1  0      
 19 14  2  0      
  5 20  2  0      
 20 21  1  0      
 21 22  2  0      
 22 23  1  0      
 23  1  2  0      
  3 24  1  0      
 24 25  1  0      
 26 27  1  0      
 27 12  1  0      
  9 28  2  0      
 15 29  2  0      
  2 30  2  0      
 23 31  1  0      
 21 32  1  0      
 19 33  1  0      
 17 34  1  0      
  7 35  1  0      
 11 36  1  0      
 24 37  1  0      
 27 38  1  0      
 25 39  1  0      
 39 40  1  0      
 26 41  1  0      
 41 42  1  0      
 42 43  1  0      
 44 41  2  0      
 39 45  2  0      
 43 46  1  0      
 43 47  1  0      
 47 48  1  0      
M  END
$$$$
