# Supplementary material for: Calcarides A–E, Antibacterial Macrocyclic and Linear Polyesters from a Calcarisporium Strain
Source: MDPI journal article supplement (doi:10.3390/md11093309), 2013-08-29
Supplement: s5 [file s5]

marinedrugs-11-03309-s002.mol
  ChemDraw11291315222D

 48 49  0  0  0  0  0  0  0  0999 V2000
   -3.9296    1.6500    0.0000 C   0  0  0  0  0  0  0  0  0  0  0  0
   -3.9296    0.8250    0.0000 C   0  0  0  0  0  0  0  0  0  0  0  0
   -3.2151    0.4125    0.0000 O   0  0  0  0  0  0  0  0  0  0  0  0
   -2.5006    1.6500    0.0000 C   0  0  0  0  0  0  0  0  0  0  0  0
   -3.2151    2.0625    0.0000 C   0  0  0  0  0  0  0  0  0  0  0  0
   -1.0717    1.6500    0.0000 O   0  0  0  0  0  0  0  0  0  0  0  0
   -1.7862    2.0625    0.0000 C   0  0  0  0  0  0  0  0  0  0  0  0
    0.3572    1.6500    0.0000 C   0  0  0  0  0  0  0  0  0  0  0  0
   -0.3572    2.0625    0.0000 C   0  0  0  0  0  0  0  0  0  0  0  0
    1.7862    1.6500    0.0000 O   0  0  0  0  0  0  0  0  0  0  0  0
    1.0717    2.0625    0.0000 C   0  0  0  0  0  0  0  0  0  0  0  0
    2.5006    0.4125    0.0000 C   0  0  0  0  0  0  0  0  0  0  0  0
    3.2151    0.8250    0.0000 C   0  0  0  0  0  0  0  0  0  0  0  0
    3.2151    1.6500    0.0000 C   0  0  0  0  0  0  0  0  0  0  0  0
    2.5006    2.0625    0.0000 C   0  0  0  0  0  0  0  0  0  0  0  0
    3.9296    0.4125    0.0000 C   0  0  0  0  0  0  0  0  0  0  0  0
    4.6441    0.8250    0.0000 C   0  0  0  0  0  0  0  0  0  0  0  0
    4.6441    1.6500    0.0000 C   0  0  0  0  0  0  0  0  0  0  0  0
    3.9296    2.0625    0.0000 C   0  0  0  0  0  0  0  0  0  0  0  0
   -3.2151    2.8875    0.0000 C   0  0  0  0  0  0  0  0  0  0  0  0
   -3.9296    3.3000    0.0000 C   0  0  0  0  0  0  0  0  0  0  0  0
   -4.6441    2.8875    0.0000 C   0  0  0  0  0  0  0  0  0  0  0  0
   -4.6441    2.0625    0.0000 C   0  0  0  0  0  0  0  0  0  0  0  0
   -3.2151   -0.4125    0.0000 C   0  0  0  0  0  0  0  0  0  0  0  0
   -2.5006   -0.8250    0.0000 C   0  0  0  0  0  0  0  0  0  0  0  0
    1.7862   -0.8250    0.0000 O   0  0  0  0  0  0  0  0  0  0  0  0
    2.5006   -0.4125    0.0000 C   0  0  0  0  0  0  0  0  0  0  0  0
   -0.3572    2.8875    0.0000 O   0  0  0  0  0  0  0  0  0  0  0  0
    2.5006    2.8875    0.0000 O   0  0  0  0  0  0  0  0  0  0  0  0
   -4.6441    0.4125    0.0000 O   0  0  0  0  0  0  0  0  0  0  0  0
   -5.3585    1.6500    0.0000 O   0  0  0  0  0  0  0  0  0  0  0  0
   -3.9296    4.1250    0.0000 O   0  0  0  0  0  0  0  0  0  0  0  0
    3.9296    2.8875    0.0000 O   0  0  0  0  0  0  0  0  0  0  0  0
    5.3585    0.4125    0.0000 O   0  0  0  0  0  0  0  0  0  0  0  0
   -1.7862    2.8875    0.0000 C   0  0  0  0  0  0  0  0  0  0  0  0
    1.0717    2.8875    0.0000 C   0  0  0  0  0  0  0  0  0  0  0  0
   -3.9296   -0.8250    0.0000 C   0  0  0  0  0  0  0  0  0  0  0  0
    3.2151   -0.8250    0.0000 C   0  0  0  0  0  0  0  0  0  0  0  0
   -2.5006   -1.6500    0.0000 C   0  0  0  0  0  0  0  0  0  0  0  0
   -1.7862   -2.0625    0.0000 O   0  0  0  0  0  0  0  0  0  0  0  0
    1.7862   -1.6500    0.0000 C   0  0  0  0  0  0  0  0  0  0  0  0
    1.0717   -2.0625    0.0000 C   0  0  0  0  0  0  0  0  0  0  0  0
    1.0717   -2.8875    0.0000 C   0  0  0  0  0  0  0  0  0  0  0  0
    2.5006   -2.0625    0.0000 O   0  0  0  0  0  0  0  0  0  0  0  0
   -3.2151   -2.0625    0.0000 O   0  0  0  0  0  0  0  0  0  0  0  0
    0.3572   -3.3000    0.0000 O   0  0  0  0  0  0  0  0  0  0  0  0
    1.7862   -3.3000    0.0000 C   0  0  0  0  0  0  0  0  0  0  0  0
    1.7862   -4.1250    0.0000 O   0  0  0  0  0  0  0  0  0  0  0  0
  1  2  1  0      
  2  3  1  0      
  4  5  1  0      
  5  1  1  0      
  6  7  1  0      
  7  4  1  0      
  8  9  1  0      
  9  6  1  0      
 10 11  1  0      
 11  8  1  0      
 12 13  1  0      
 13 14  1  0      
 14 15  1  0      
 15 10  1  0      
 13 16  2  0      
 16 17  1  0      
 17 18  2  0      
 18 19  1  0      
 19 14  2  0      
  5 20  2  0      
 20 21  1  0      
 21 22  2  0      
 22 23  1  0      
 23  1  2  0      
  3 24  1  0      
 24 25  1  0      
 26 27  1  0      
 27 12  1  0      
  9 28  2  0      
 15 29  2  0      
  2 30  2  0      
 23 31  1  0      
 21 32  1  0      
 19 33  1  0      
 17 34  1  0      
  7 35  1  1      
 11 36  1  1      
 24 37  1  1      
 27 38  1  1      
 25 39  1  0      
 39 40  1  0      
 26 41  1  0      
 41 42  1  0      
 42 43  1  0      
 44 41  2  0      
 39 45  2  0      
 43 46  1  0      
 43 47  1  1      
 47 48  1  0      
M  END
