# Supplementary material for: Calcarides A–E, Antibacterial Macrocyclic and Linear Polyesters from a Calcarisporium Strain
Source: MDPI journal article supplement (doi:10.3390/md11093309), 2013-08-29
Supplement: s6 [file s6]

marinedrugs-11-03309-s003.mol
  corina  12171322123D 1   1.00000     0.00000 
CORINA 3.49 0023  12.04.2013
 41 42  0  0  0  0  0  0  0  0999 V2000
    0.7174    2.7070    0.1415 C   0  0  0  0  0  0  0  0  0  0  0  0
    2.0274    3.3770    0.1207 C   0  0  0  0  0  0  0  0  0  0  0  0
    2.6452    3.6850    1.2784 O   0  0  0  0  0  0  0  0  0  0  0  0
    1.9034    0.4911    0.0092 C   0  0  0  0  0  0  0  0  0  0  0  0
    0.6414    1.3110    0.0881 C   0  0  0  0  0  0  0  0  0  0  0  0
    1.3188   -0.3833   -2.1871 O   0  0  0  0  0  0  0  0  0  0  0  0
    2.3318    0.3538   -1.4531 C   0  0  0  0  0  0  0  0  0  0  0  0
    0.1286   -0.7887   -4.3119 C   0  0  0  0  0  0  0  0  0  0  0  0
    1.2253   -0.1434   -3.5045 C   0  0  0  0  0  0  0  0  0  0  0  0
    0.1249    0.9962   -5.9684 O   0  0  0  0  0  0  0  0  0  0  0  0
    0.3063   -0.4332   -5.7894 C   0  0  0  0  0  0  0  0  0  0  0  0
   -1.3611    2.5514   -8.6150 C   0  0  0  0  0  0  0  0  0  0  0  0
   -0.3703    3.5100   -8.0062 C   0  0  0  0  0  0  0  0  0  0  0  0
    0.6751    3.0243   -7.2133 C   0  0  0  0  0  0  0  0  0  0  0  0
    0.8098    1.5789   -6.9725 C   0  0  0  0  0  0  0  0  0  0  0  0
   -0.4907    4.8507   -8.2338 C   0  0  0  0  0  0  0  0  0  0  0  0
    0.4195    5.7439   -7.6759 C   0  0  0  0  0  0  0  0  0  0  0  0
    1.4585    5.2797   -6.8826 C   0  0  0  0  0  0  0  0  0  0  0  0
    1.5951    3.9218   -6.6487 C   0  0  0  0  0  0  0  0  0  0  0  0
   -0.5746    0.6906    0.1078 C   0  0  0  0  0  0  0  0  0  0  0  0
   -1.7457    1.4394    0.1801 C   0  0  0  0  0  0  0  0  0  0  0  0
   -1.6884    2.8243    0.2327 C   0  0  0  0  0  0  0  0  0  0  0  0
   -0.4611    3.4655    0.2207 C   0  0  0  0  0  0  0  0  0  0  0  0
    3.8826    4.4388    1.1849 C   0  0  0  0  0  0  0  0  0  0  0  0
    4.0987    5.2270    2.4784 C   0  0  0  0  0  0  0  0  0  0  0  0
   -0.6852    3.0870  -10.8726 O   0  0  0  0  0  0  0  0  0  0  0  0
   -0.8060    2.0147   -9.9358 C   0  0  0  0  0  0  0  0  0  0  0  0
    2.0204    0.5899   -4.0429 O   0  0  0  0  0  0  0  0  0  0  0  0
    1.5387    0.9105   -7.6790 O   0  0  0  0  0  0  0  0  0  0  0  0
    2.5523    3.6526   -0.9403 O   0  0  0  0  0  0  0  0  0  0  0  0
   -0.3986    4.8195    0.2721 O   0  0  0  0  0  0  0  0  0  0  0  0
   -2.9488    0.8118    0.1986 O   0  0  0  0  0  0  0  0  0  0  0  0
    2.6088    3.4618   -5.8735 O   0  0  0  0  0  0  0  0  0  0  0  0
    0.2901    7.0744   -7.9093 O   0  0  0  0  0  0  0  0  0  0  0  0
    3.6626   -0.3976   -1.5263 C   0  0  0  0  0  0  0  0  0  0  0  0
   -0.7309   -1.1874   -6.6238 C   0  0  0  0  0  0  0  0  0  0  0  0
    5.0521    3.4752    0.9735 C   0  0  0  0  0  0  0  0  0  0  0  0
   -1.7562    0.9538  -10.4948 C   0  0  0  0  0  0  0  0  0  0  0  0
    2.9999    6.2464    2.6349 C   0  0  0  0  0  0  0  0  0  0  0  0
    2.9843    7.0575    3.7043 O   0  0  0  0  0  0  0  0  0  0  0  0
    2.1330    6.3336    1.7979 O   0  0  0  0  0  0  0  0  0  0  0  0
  1  2  1  0      
  2  3  1  0      
  4  5  1  0      
  5  1  1  0      
  6  7  1  0      
  7  4  1  0      
  8  9  1  0      
  9  6  1  0      
 10 11  1  0      
 11  8  1  0      
 12 13  1  0      
 13 14  1  0      
 14 15  1  0      
 15 10  1  0      
 13 16  2  0      
 16 17  1  0      
 17 18  2  0      
 18 19  1  0      
 19 14  2  0      
  5 20  2  0      
 20 21  1  0      
 21 22  2  0      
 22 23  1  0      
 23  1  2  0      
  3 24  1  0      
 24 25  1  0      
 26 27  1  0      
 27 12  1  0      
  9 28  2  0      
 15 29  2  0      
  2 30  2  0      
 23 31  1  0      
 21 32  1  0      
 19 33  1  0      
 17 34  1  0      
  7 35  1  0      
 11 36  1  0      
 24 37  1  0      
 27 38  1  0      
 25 39  1  0      
 39 40  1  0      
 39 41  2  0      
M  END
$$$$
