# Supplementary material for: Calcarides A–E, Antibacterial Macrocyclic and Linear Polyesters from a Calcarisporium Strain
Source: MDPI journal article supplement (doi:10.3390/md11093309), 2013-08-29
Supplement: s14 [file s14]

marinedrugs-11-03309-s007.mol
  corina  12171322133D 1   1.00000     0.00000 
CORINA 3.49 0023  12.04.2013
 47 49  0  0  0  0  0  0  0  0999 V2000
   -0.0179    1.4653    0.0101 C   0  0  0  0  0  0  0  0  0  0  0  0
    0.0021   -0.0041    0.0020 C   0  0  0  0  0  0  0  0  0  0  0  0
   -1.1066   -0.7047    0.3168 O   0  0  0  0  0  0  0  0  0  0  0  0
    2.5114    1.5353    0.0427 C   0  0  0  0  0  0  0  0  0  0  0  0
    1.1670    2.2097    0.0028 C   0  0  0  0  0  0  0  0  0  0  0  0
    4.7521    1.6521    1.0112 O   0  0  0  0  0  0  0  0  0  0  0  0
    3.4546    2.2856    0.9835 C   0  0  0  0  0  0  0  0  0  0  0  0
    6.2246   -0.3145    1.2469 C   0  0  0  0  0  0  0  0  0  0  0  0
    4.8653    0.3417    1.2577 C   0  0  0  0  0  0  0  0  0  0  0  0
    7.9458   -1.0012    2.8403 O   0  0  0  0  0  0  0  0  0  0  0  0
    7.0048    0.0431    2.5073 C   0  0  0  0  0  0  0  0  0  0  0  0
    6.6683   -4.9364    3.8047 C   0  0  0  0  0  0  0  0  0  0  0  0
    8.1345   -4.6034    3.7227 C   0  0  0  0  0  0  0  0  0  0  0  0
    8.5325   -3.3082    3.3518 C   0  0  0  0  0  0  0  0  0  0  0  0
    7.5388   -2.2621    3.0510 C   0  0  0  0  0  0  0  0  0  0  0  0
    9.0808   -5.5388    4.0169 C   0  0  0  0  0  0  0  0  0  0  0  0
   10.4391   -5.2449    3.9306 C   0  0  0  0  0  0  0  0  0  0  0  0
   10.8471   -3.9775    3.5465 C   0  0  0  0  0  0  0  0  0  0  0  0
    9.9004   -3.0097    3.2546 C   0  0  0  0  0  0  0  0  0  0  0  0
    1.1066    3.5764   -0.0649 C   0  0  0  0  0  0  0  0  0  0  0  0
   -0.1182    4.2398   -0.0739 C   0  0  0  0  0  0  0  0  0  0  0  0
   -1.2992    3.5186   -0.0236 C   0  0  0  0  0  0  0  0  0  0  0  0
   -1.2565    2.1351    0.0166 C   0  0  0  0  0  0  0  0  0  0  0  0
   -1.0129   -2.1527    0.2908 C   0  0  0  0  0  0  0  0  0  0  0  0
   -0.6476   -2.6745    1.6798 C   0  0  0  0  0  0  0  0  0  0  0  0
   -0.0604   -4.0599    1.5660 C   0  0  0  0  0  0  0  0  0  0  0  0
   -0.1158   -4.9012    2.6083 O   0  0  0  0  0  0  0  0  0  0  0  0
    2.9081   -6.7170    2.6276 C   0  0  0  0  0  0  0  0  0  0  0  0
    4.1176   -6.2144    3.3794 C   0  0  0  0  0  0  0  0  0  0  0  0
    5.2773   -6.8707    3.2687 O   0  0  0  0  0  0  0  0  0  0  0  0
    6.4416   -6.4326    4.0144 C   0  0  0  0  0  0  0  0  0  0  0  0
    0.4624   -6.2214    2.4455 C   0  0  0  0  0  0  0  0  0  0  0  0
    1.6371   -6.3928    3.4130 C   0  0  0  0  0  0  0  0  0  0  0  0
    3.8945   -0.3416    1.4806 O   0  0  0  0  0  0  0  0  0  0  0  0
    6.3612   -2.5522    2.9902 O   0  0  0  0  0  0  0  0  0  0  0  0
    4.0193   -5.2248    4.0655 O   0  0  0  0  0  0  0  0  0  0  0  0
    0.4635   -4.4055    0.5343 O   0  0  0  0  0  0  0  0  0  0  0  0
    1.0039   -0.6121   -0.3195 O   0  0  0  0  0  0  0  0  0  0  0  0
   -2.4154    1.4320    0.0653 O   0  0  0  0  0  0  0  0  0  0  0  0
   -0.1550    5.5940   -0.1345 O   0  0  0  0  0  0  0  0  0  0  0  0
   10.3069   -1.7727    2.8734 O   0  0  0  0  0  0  0  0  0  0  0  0
   11.3595   -6.1978    4.2257 O   0  0  0  0  0  0  0  0  0  0  0  0
    1.3517   -7.4612    4.3179 O   0  0  0  0  0  0  0  0  0  0  0  0
    2.8561    2.3224    2.3911 C   0  0  0  0  0  0  0  0  0  0  0  0
    6.0564    0.3000    3.6775 C   0  0  0  0  0  0  0  0  0  0  0  0
   -2.3661   -2.7325   -0.1312 C   0  0  0  0  0  0  0  0  0  0  0  0
    6.2343   -6.7225    5.5021 C   0  0  0  0  0  0  0  0  0  0  0  0
  1  2  1  0      
  2  3  1  0      
  4  5  1  0      
  5  1  1  0      
  6  7  1  0      
  7  4  1  0      
  8  9  1  0      
  9  6  1  0      
 10 11  1  0      
 11  8  1  0      
 12 13  1  0      
 13 14  1  0      
 14 15  1  0      
 15 10  1  0      
 13 16  2  0      
 16 17  1  0      
 17 18  2  0      
 18 19  1  0      
 19 14  2  0      
  5 20  2  0      
 20 21  1  0      
 21 22  2  0      
 22 23  1  0      
 23  1  2  0      
  3 24  1  0      
 24 25  1  0      
 25 26  1  0      
 26 27  1  0      
 28 29  1  0      
 29 30  1  0      
 30 31  1  0      
 31 12  1  0      
 27 32  1  0      
 32 33  1  0      
 28 33  1  0      
  9 34  2  0      
 15 35  2  0      
 29 36  2  0      
 26 37  2  0      
  2 38  2  0      
 23 39  1  0      
 21 40  1  0      
 19 41  1  0      
 17 42  1  0      
 33 43  1  0      
  7 44  1  0      
 11 45  1  0      
 24 46  1  0      
 31 47  1  0      
M  END
$$$$
